# Supplementary material
Source: Springer Nature journal article supplement (https://www.springermedizin.de/resource/supplementary/12943_2011_1023_MOESM4_ESM.pdf/9552072)

— 500 nM TAK733  
— 50 nM TAK733  
— Vehicle

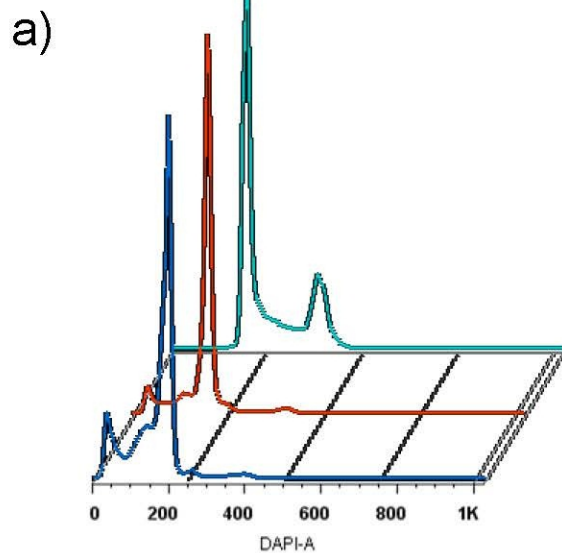

M249 (BRAF mutant, sensitive)

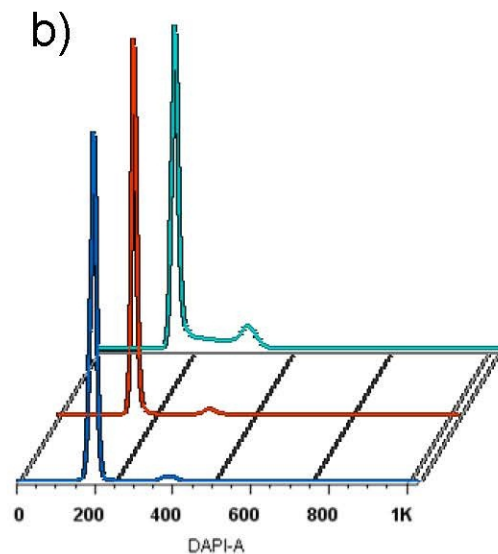

M233 (BRAF mutant, resistant)

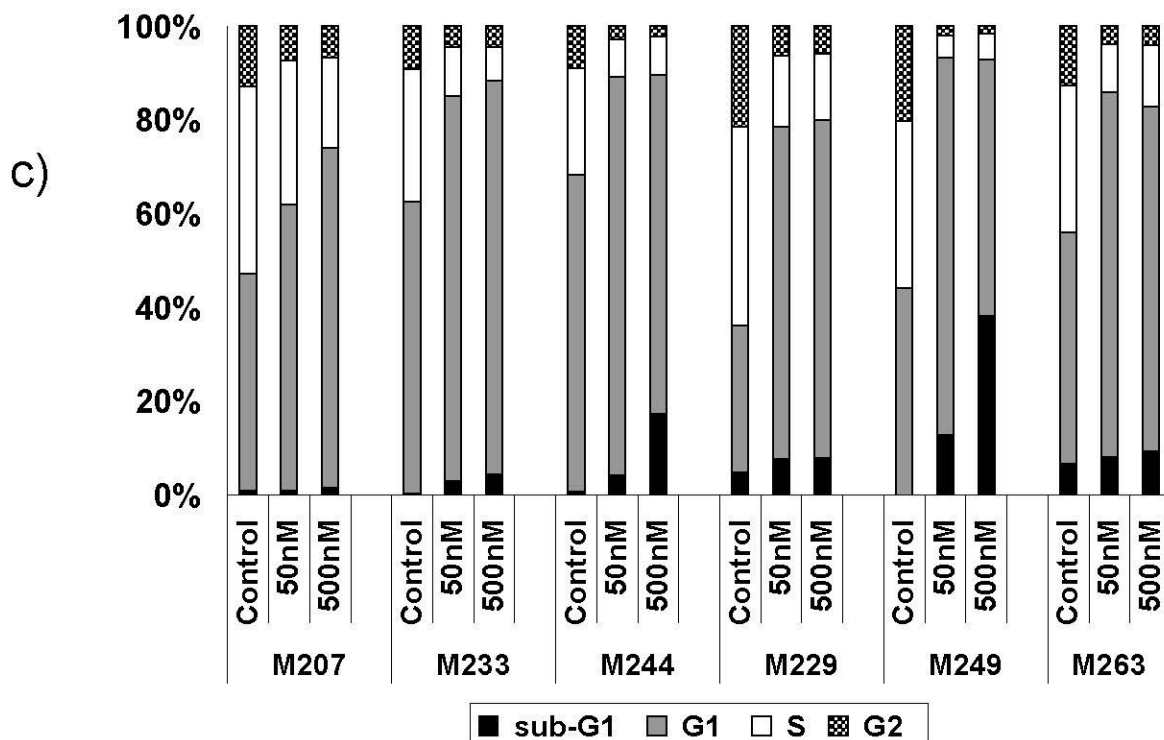

Supplement: MOESM4 [file 9552072]
